# Supplementary material for: Alignment and Prediction of cis-Regulatory Modules Based on a Probabilistic Model of Evolution
Source: PubMed Central journal article supplement (PMC2657044; doi:10.1371/journal.pcbi.1000299), 2009-03-13

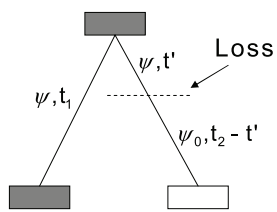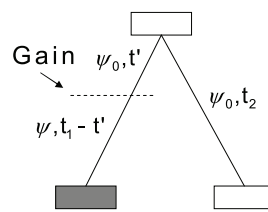

Supplement: pcbi.1000299.s001.pdf [file pcbi.1000299.s001.pdf]
